# Supplementary material for: Identification and Expression Analysis of the Genes Involved in the Raffinose Family Oligosaccharides Pathway of Phaseolus vulgaris and Glycine max
Source: MDPI journal article supplement (doi:10.3390/plants10071465), 2021-07-16
Supplement: s1 [file s1]

|                             |                |         |                                  |     |                                   |
|-----------------------------|----------------|---------|----------------------------------|-----|-----------------------------------|
| <i>Arabidopsis thaliana</i> | OAP05273.1     | AtSIP2  |                                  | 773 | Shaun Peters <i>et al.</i> (2010) |
|                             | AAQ07251.2     | ZmAGA1  |                                  | 756 | Zhao <i>et al.</i> (2006)         |
| <i>Zea mays</i>             | NP_001105794.2 | ZmAGA2  | Alkaline $\alpha$ -galactosidase | 843 | Zhao <i>et al.</i> (2006)         |
|                             | NP_001105775.2 | ZmAGA3  |                                  | 747 | Zhao <i>et al.</i> (2006)         |
| <i>Cucumis melo</i>         | AAM75139.1     | CmAGA1  |                                  | 754 | Carmi <i>et al.</i> (2003)        |
|                             | AAM75140.1     | CmAGA2  |                                  | 772 | Carmi <i>et al.</i> (2003)        |
| <i>Arabidopsis thaliana</i> | NP_191190.2    | AtAGAL3 |                                  | 437 | Imaizumi <i>et al.</i> (2017)     |
| <i>Solanum lycopersicum</i> | AAF04591.1     | SlAGAL  | $\alpha$ -galactosidase          | 409 | Tsaniklidis <i>et al.</i> (2016)  |
| <i>Arabidopsis thaliana</i> | NP_001031855.1 | AtAGAL2 |                                  | 370 | Imaizumi <i>et al.</i> (2017)     |

**Table S2.** Primers used for qRT-PCR.

| Accession number                        | Function            | Forward Primer                              | T <sub>m</sub> (°C) | Reverse Primer                               | T <sub>m</sub> (°C) | Amplicon length (nt) |
|-----------------------------------------|---------------------|---------------------------------------------|---------------------|----------------------------------------------|---------------------|----------------------|
| Phvul.001G215300                        | Galactinol synthase | 5'CGCGTAGGAG<br>ATGACTTTTG <sup>3'</sup>    | 60.5                | 5'GCACATGGG<br>TGAGTAGATTG <sup>3'</sup>     | 60.4                | 103                  |
| Phvul.001G223700                        | Galactinol synthase | 5'ACAGTGCCCTA<br>ATAAAGTTCAG <sup>3'</sup>  | 60.4                | 5'GTTTCAGAAA<br>GTCCTGCTCAG <sup>3'</sup>    | 60.2                | 168                  |
| Phvul.007G203400                        | Galactinol synthase | 5'GAATTTGGGA<br>GTTTGTGGAG <sup>3'</sup>    | 58.9                | 5'AGAAGTAGTTAT<br>CAGGCAAGTC <sup>3'</sup>   | 59.6                | 161                  |
| Phvul.004G007100                        | Raffinose synthase  | 5'GACAATATTT<br>CGGTGTGCGT <sup>3'</sup>    | 61                  | 5'TAGAAGGTTGA<br>AGCTTCCCA <sup>3'</sup>     | 60.9                | 155                  |
| Phvul.009G175400                        | Raffinose synthase  | 5'GACCCATTAC<br>GTTAGTGATTGTG <sup>3'</sup> | 61.8                | 5'CACCTGTATGTT<br>TGTGAGATTCC <sup>3'</sup>  | 61.8                | 131                  |
| Phvul.001G214300                        | Stachyose synthase  | 5'CTCATTAAGAAG<br>CTTGTCTTCCC <sup>3'</sup> | 61.1                | 5'CTCCTCCATACT<br>TATTGAAGTTCC <sup>3'</sup> | 60.5                | 144                  |
| CV530631 (Pereira <i>et al.</i> , 2017) | $\beta$ -Tubulin    | 5'CCGTTGTGGA<br>GCCTTACAAT <sup>3'</sup>    | 62.4                | 5'GCTTGGGGTC<br>CTGAAACAA <sup>3'</sup>      | 62.4                | 117                  |
